# Supplementary material
Source: publisher figshare collection journal article supplement (https://frontiersin.figshare.com/ndownloader/files/27538922)

C

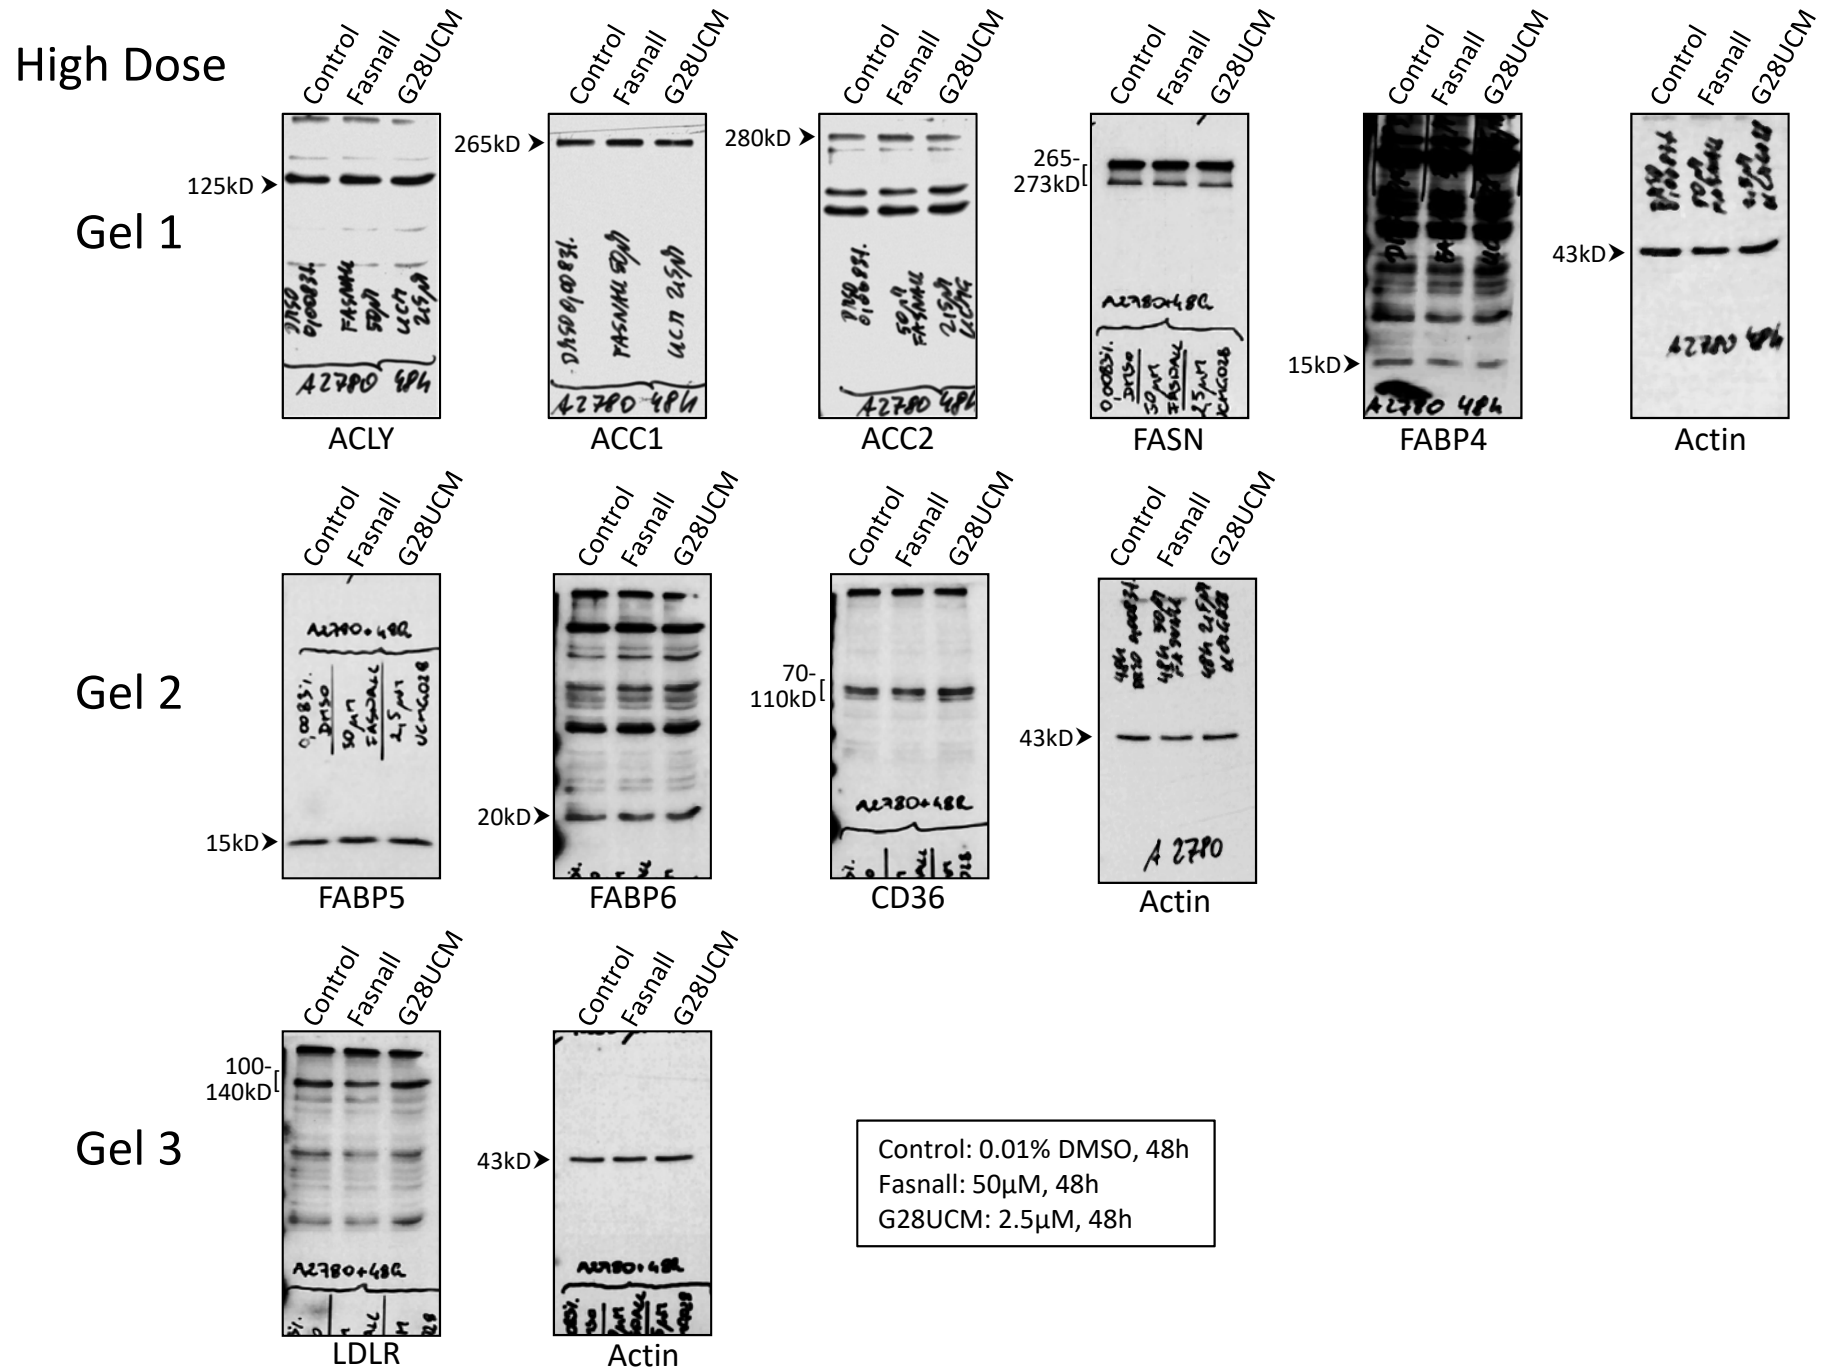

Supplementary Figure S3

Supplement: Supplementary file 1 [file 27538922]

**B**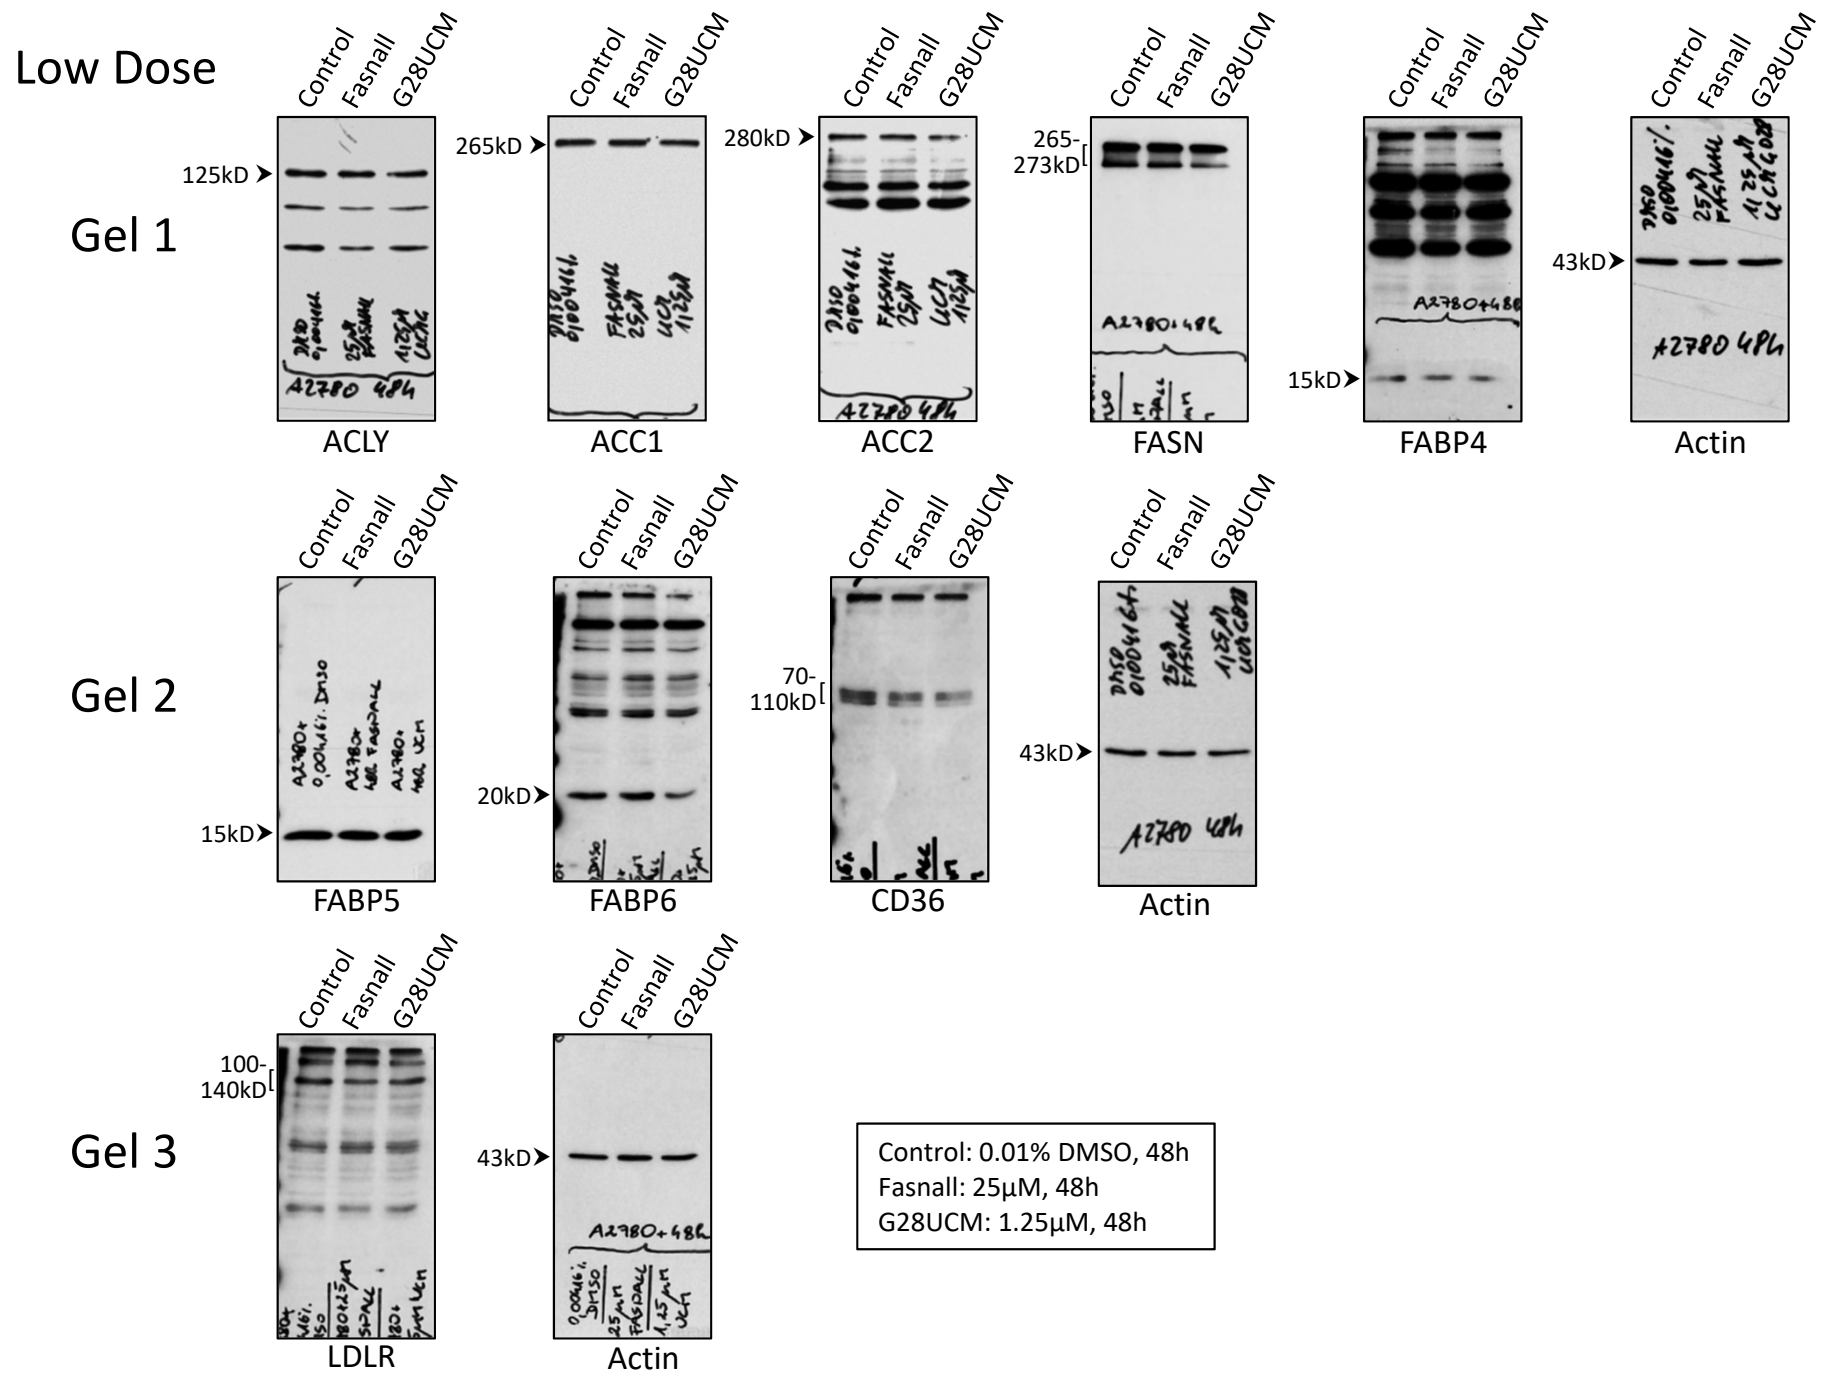

Supplementary Figure S3

Supplement: Supplementary file 2 [file 27538922]

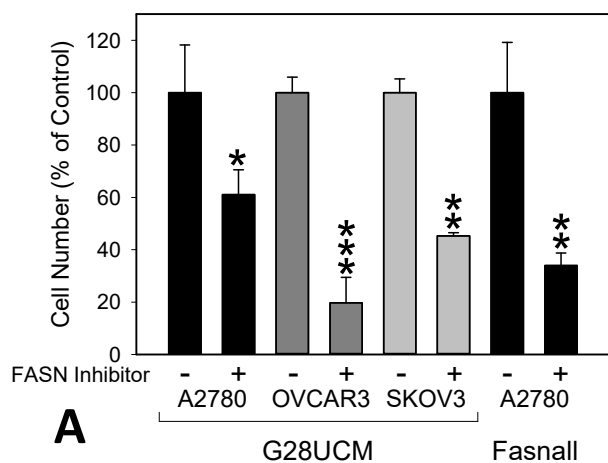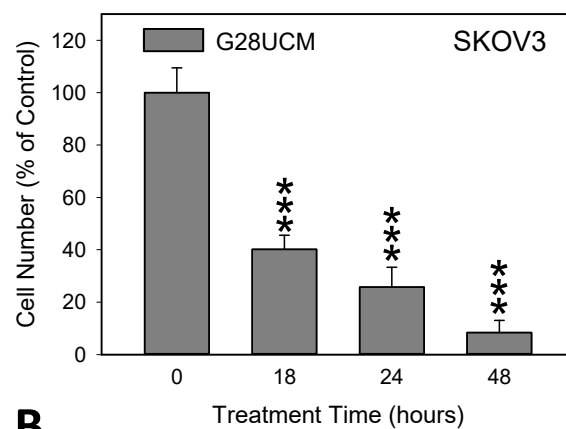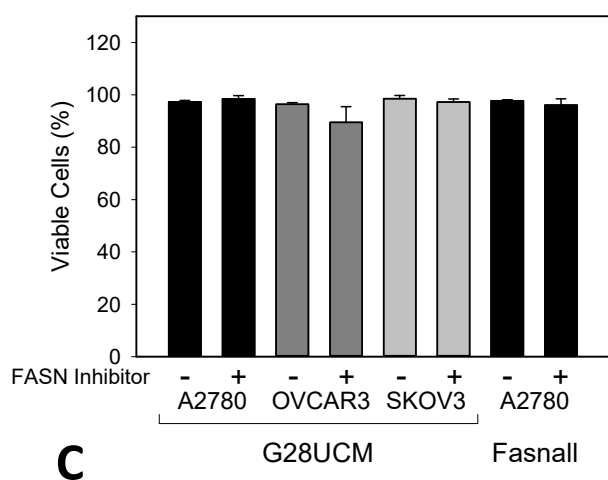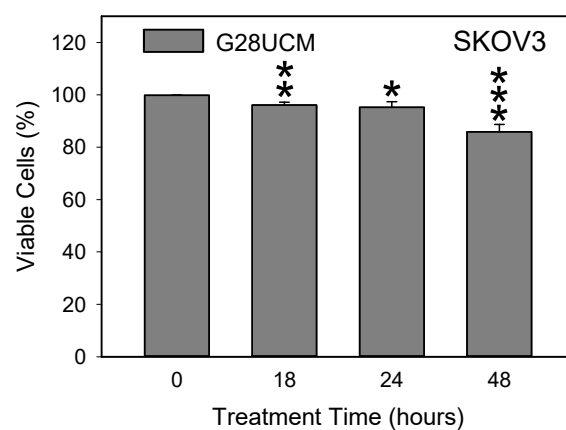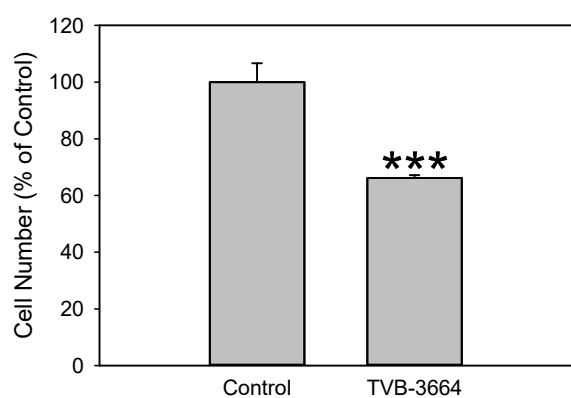

Supplementary Figure S2

Supplement: Supplementary file 3 [file 27538922]

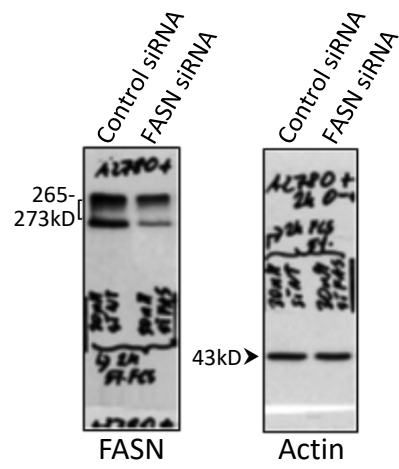

Supplementary Figure S1

Supplement: Supplementary file 4 [file 27538922]

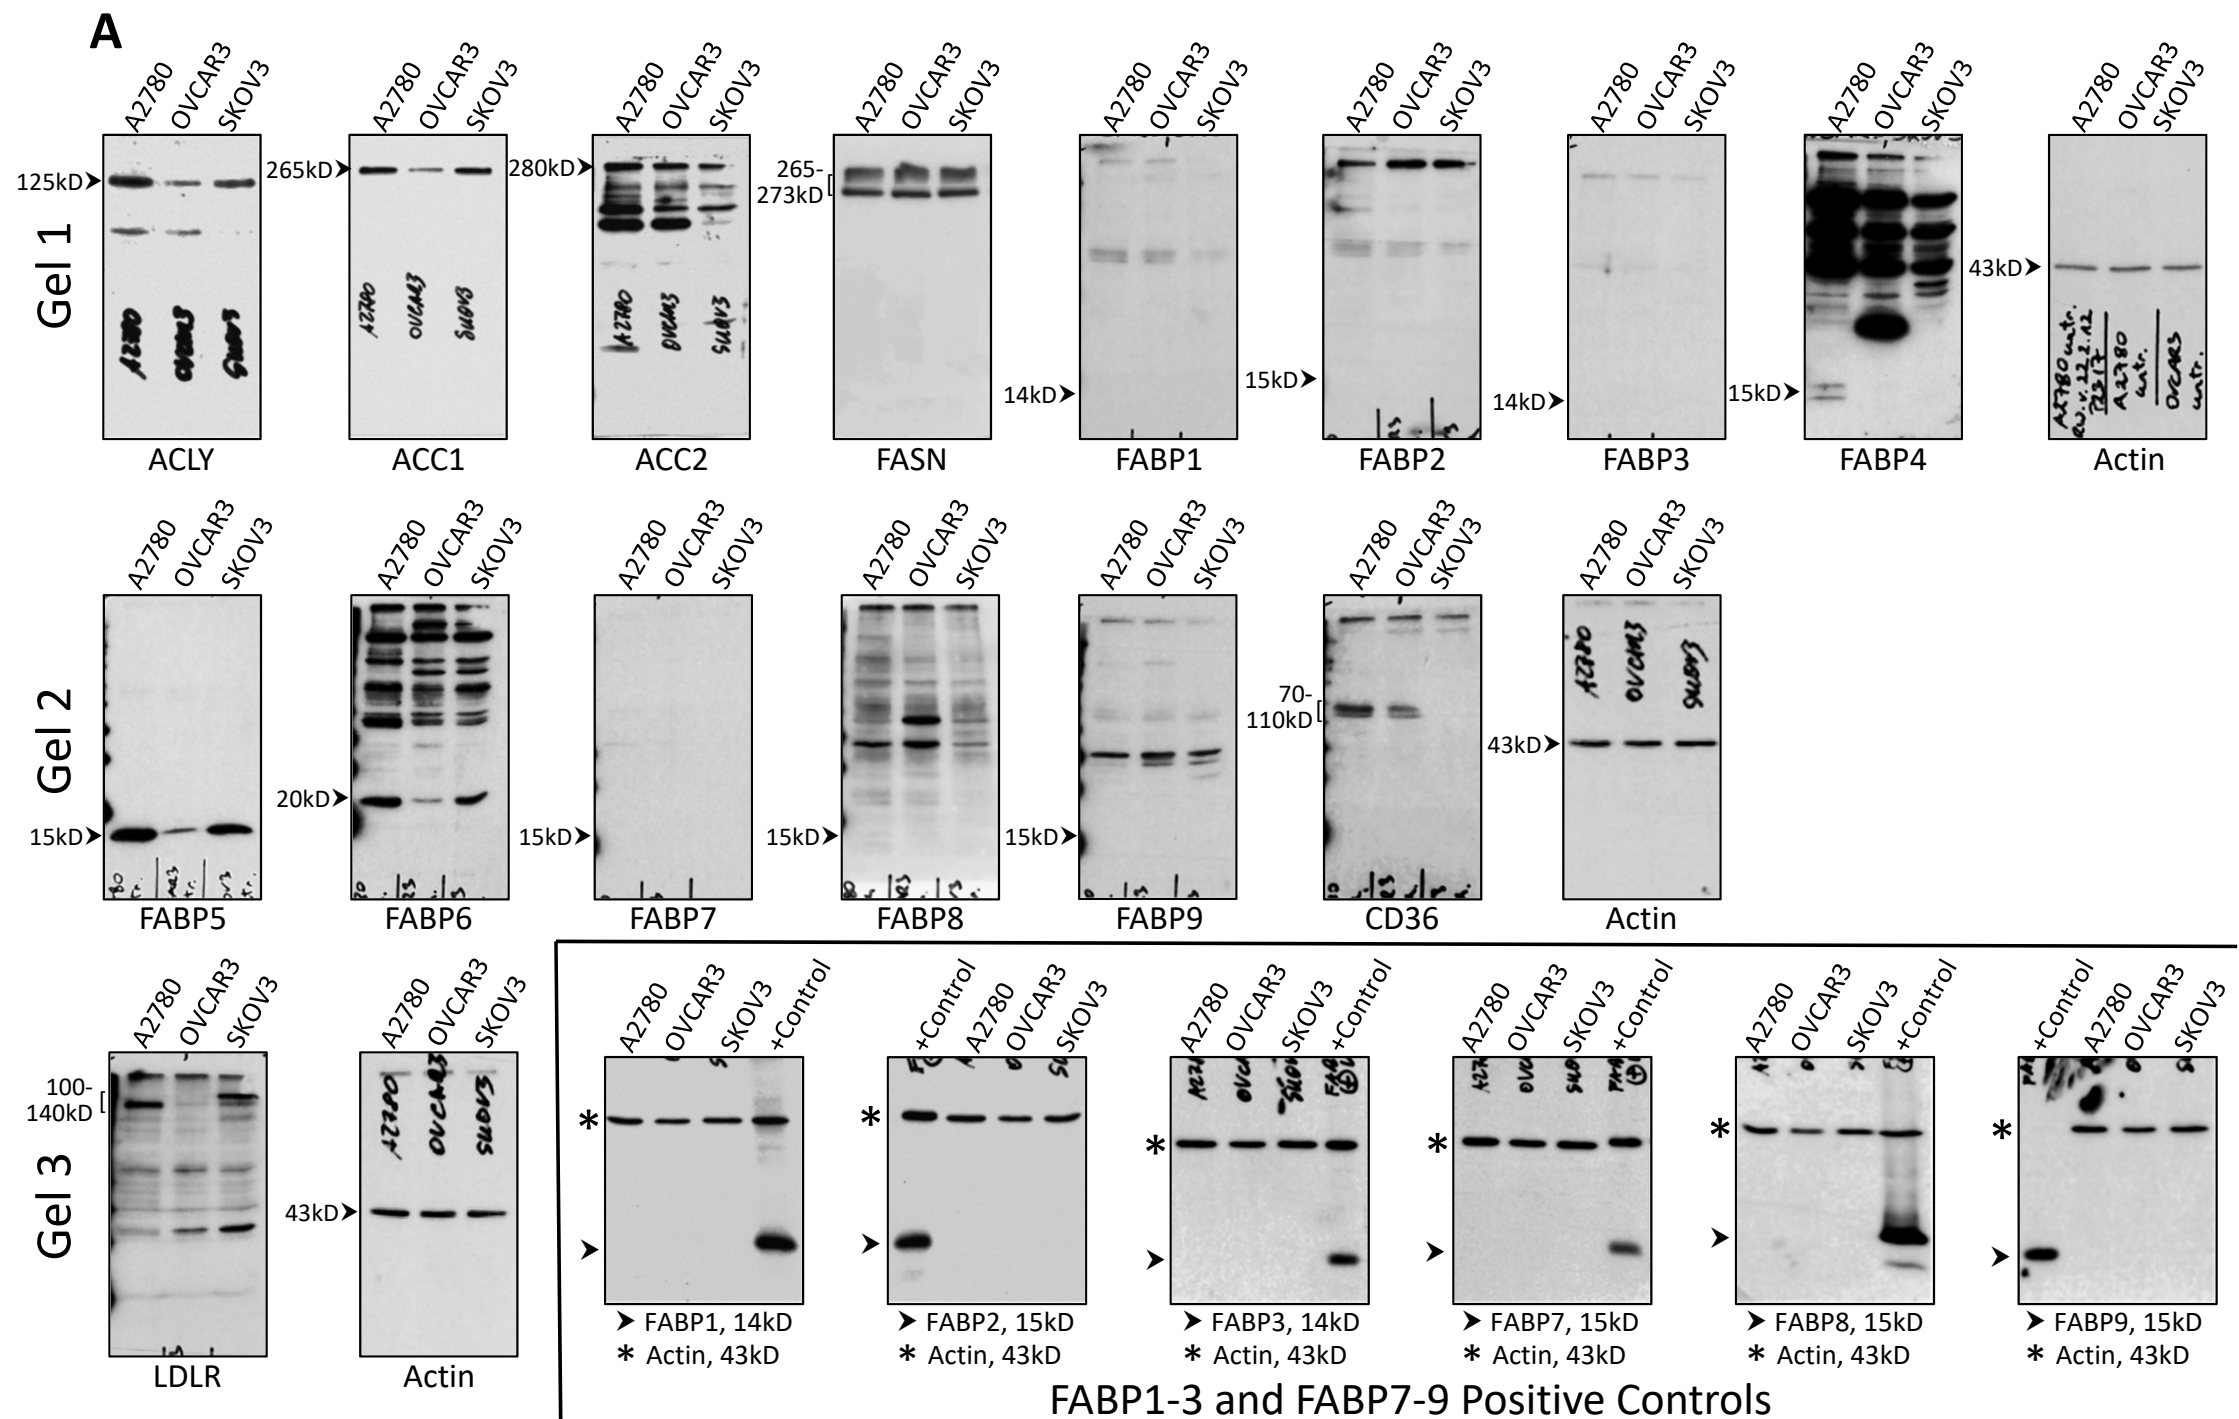

Supplementary Figure S3

Supplement: Supplementary file 5 [file 27538922]

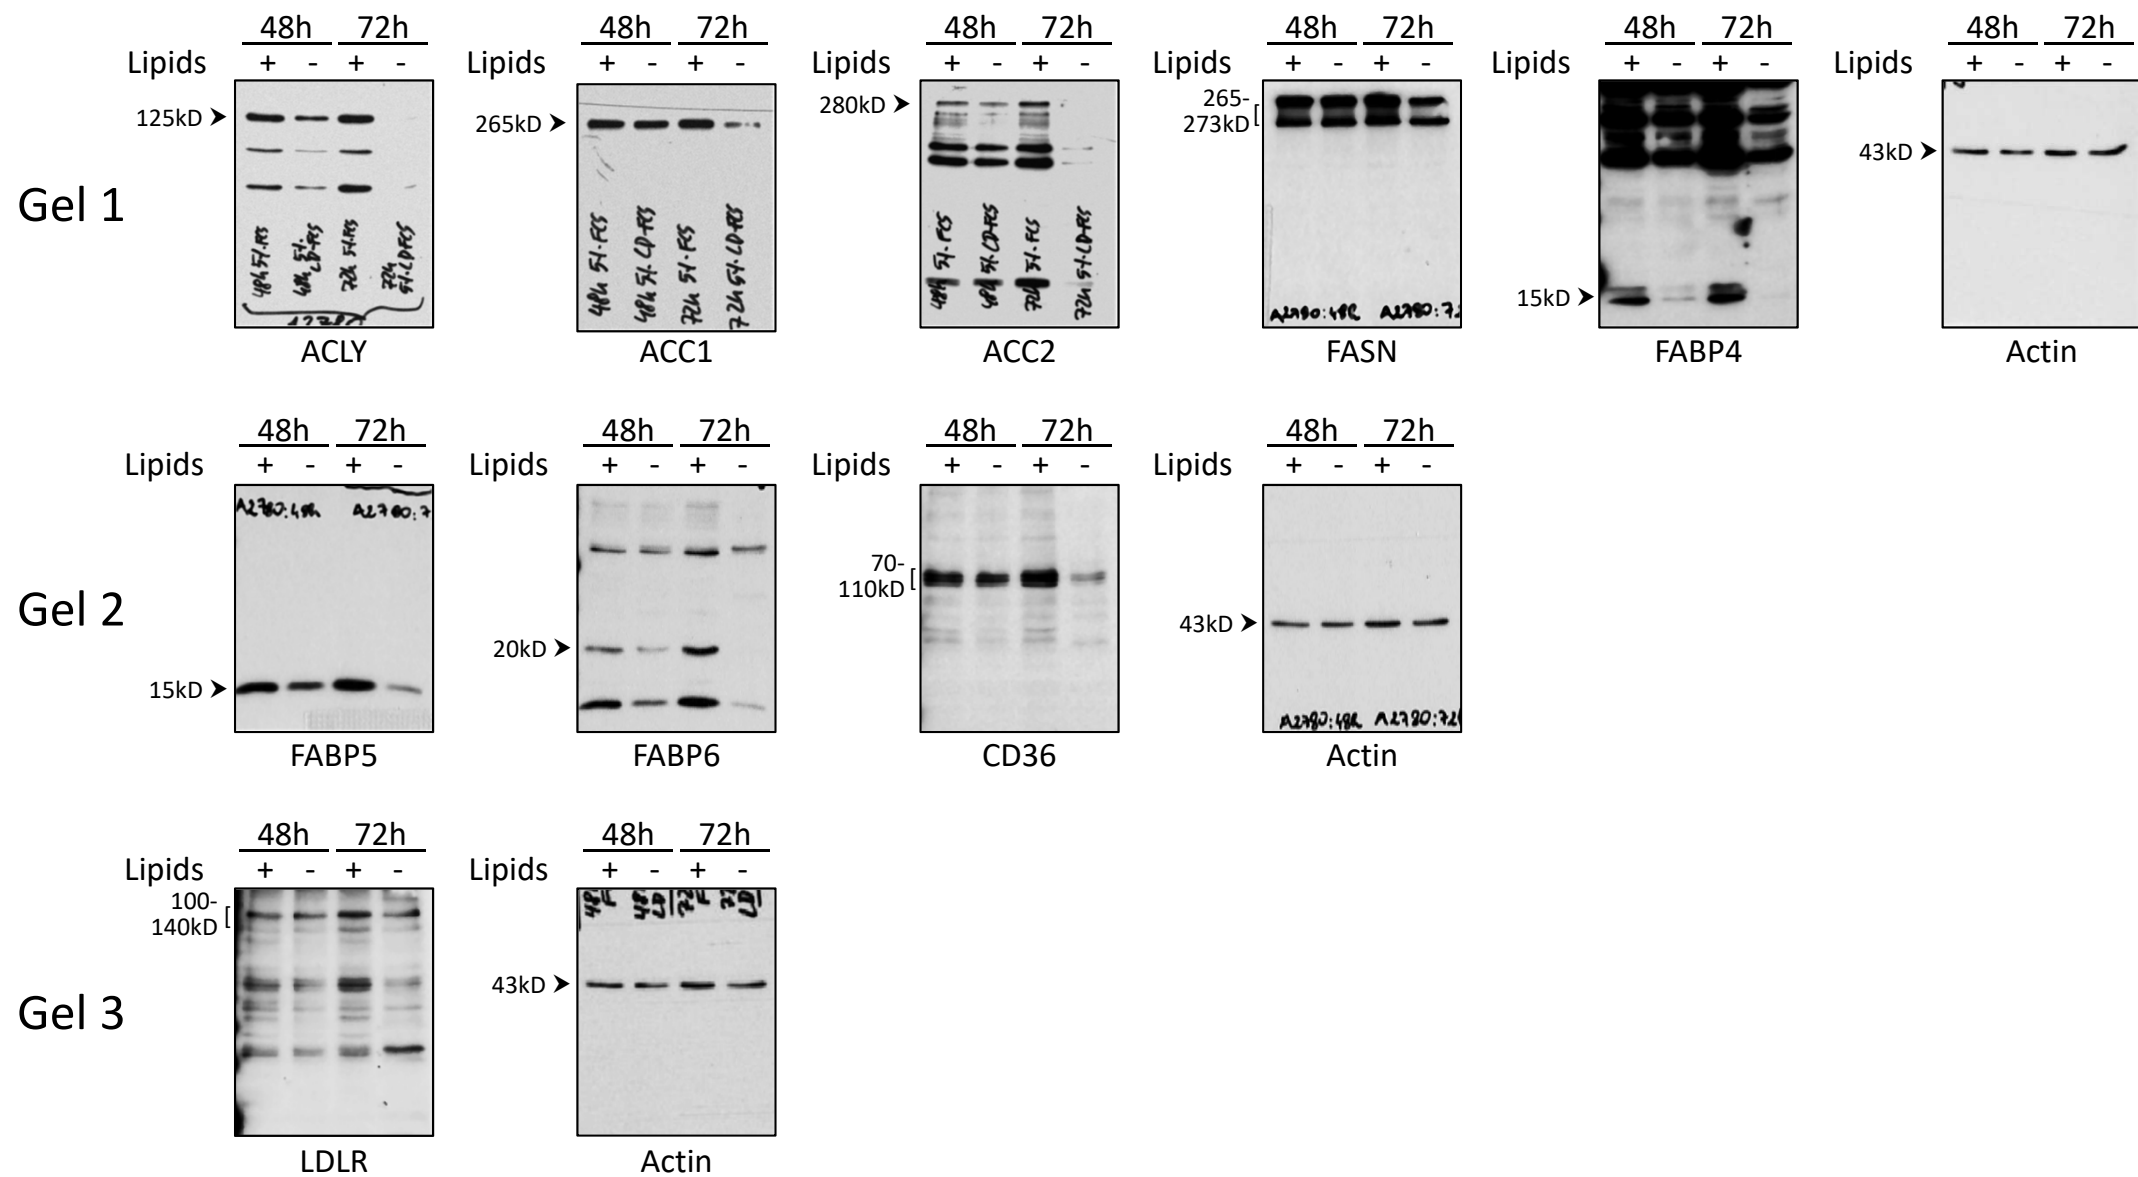

Supplementary Figure S4

Supplement: Supplementary file 6 [file 27538922]
